# Supplementary material for: Development of a Waterproof Crack-Based Stretchable Strain Sensor Based on PDMS Shielding
Source: Sensors (Basel). 2018 Apr 12;18(4):1171. doi: 10.3390/s18041171 (PMC5948561; doi:10.3390/s18041171)
Supplement: Supplementary file 1 [file sensors-18-01171-s001.zip]

Archive with 5 entries (4 files):
- sensors-280032-suppementary file/
- sensors-280032-suppementary file/Supplementary Information.doc
- sensors-280032-suppementary file/Supplementary Movie S1.avi
- Supplementary Movie S1.avi
- Supplementary Information.pdf
